# Supplementary material for: Temporal Trends and Familial Clustering of Ideal Cardiovascular Health in Parents and Offspring Over the Life Course: An Investigation Using The Framingham Heart Study
Source: PubMed Central journal article supplement — J Am Heart Assoc. 2020 Jun 3;9(12):e016292. doi: 10.1161/JAHA.120.016292 (PMC7429037; doi:10.1161/jaha.120.016292), 2020-06-03
Supplement: JAH3-9-e016292-s001.pdf [file JAH3-9-e016292-s001.pdf]

# **SUPPLEMENTAL MATERIAL**

**Table S1. Selected Framingham Heart Study Exam Dates and age ranges for parents and offspring.**

| Original Cohort |            |           |          |           | Offspring Cohort |            |           |          |           |
|-----------------|------------|-----------|----------|-----------|------------------|------------|-----------|----------|-----------|
| Exam            | Exam Dates | Age Range | Mean Age | Attendees | Exam             | Exam Dates | Age Range | Mean Age | Attendees |
| Exam1           | 1948-1952  | 28-74     | 44       | 5209      | Exam2            | 1979-1983  | 17-77     | 44       | 3863      |
| Exam3           | 1953-1956  | 32-67     | 48       | 4416      | Exam3            | 1983-1987  | 18-77     | 48       | 3873      |
| Exam5           | 1956-1960  | 37-70     | 52       | 4421      | Exam4            | 1987-1991  | 22-81     | 52       | 4019      |
| Exam7           | 1961-1964  | 40-74     | 55       | 4191      | Exam5            | 1991-1995  | 26-84     | 55       | 3799      |
| Exam9           | 1965-1968  | 44-78     | 59       | 3893      | Exam6            | 1995-1998  | 29-86     | 59       | 3532      |
| Exam11          | 1969-1971  | 49-81     | 62       | 2955      | Exam7            | 1998-2001  | 33-90     | 62       | 3539      |

Table on selected exam pairs of FHS-Original and Offspring Cohorts. Adapted from the “Framingham Heart Study: A Review of Research Design” Interventions Obes Diabetes; 2018: 1, by Urooj T., 2018. Retrieved from <https://crimsonpublishers.com/iod/pdf/IOD.000505.pdf>

**Table S2. Ideal Cardiovascular Health Metrics using AHA criteria for adults  $\geq 20$  years.**

|                                     |                  |                                      |
|-------------------------------------|------------------|--------------------------------------|
| <b>Blood Pressure</b>               | Ideal [2]        | <120/<80 mmHg                        |
|                                     | Intermediate [1] | SBP 120–139 or DBP 80–89 mmHg        |
|                                     | Poor [0]         | SBP $\geq$ 140 or DBP $\geq$ 90mmHg  |
| <b>Cholesterol</b>                  | Ideal [2]        | <200 mg/dL                           |
|                                     | Intermediate [1] | 200–239 mg/dL                        |
|                                     | Poor [0]         | $\geq$ 240 mg/dL                     |
| <b>Body Mass Index</b>              | Ideal [2]        | <25 kg/m <sup>2</sup>                |
|                                     | Intermediate [1] | 25–29.9 kg/m <sup>2</sup>            |
|                                     | Poor [0]         | $\geq$ 30 kg/m <sup>2</sup>          |
| <b>Smoking Status</b>               | Ideal [2]        | Never or quit > 12 months            |
|                                     | Intermediate [1] | Former $\leq$ 12 months              |
|                                     | Poor [0]         | Current smoker                       |
| <b>Fasting/Random Blood Glucose</b> | Ideal [2]        | <100 mg/dL OR <140 mg/dL             |
|                                     | Intermediate [1] | 100–125 mg/dL OR 140-199 mg/dL       |
|                                     | Poor [0]         | $\geq$ 126 mg/dL OR $\geq$ 200 mg/dL |

Key: SBP, Systolic blood pressure; DBP, diastolic blood pressure; Adapted from “2017 Statistical Fact Sheet: Cardiovascular health” by AHA, 2017. Retrieved from [https://healthmetrics.heart.org/wp-content/uploads/2017/06/2017-Statistical-Fact-Sheet-ucm\\_492104.pdf](https://healthmetrics.heart.org/wp-content/uploads/2017/06/2017-Statistical-Fact-Sheet-ucm_492104.pdf)

**Table S3. Proportional odds regression model predicting offspring CVH from mother's and father's CVH at each paired exam cycle.**

| Offspring-mother association |                            |       |           | Offspring-father association |                            |       |            |
|------------------------------|----------------------------|-------|-----------|------------------------------|----------------------------|-------|------------|
| Offspring Exam               | Mother's CVH               | OR    | 95% CI    | Offspring Exam               | Father's CVH               | OR    | 95% CI     |
| Exam 1 n= 2,050              | <i>Referent: Ideal CVH</i> |       |           | Exam 1 n= 1,944              | <i>Referent: Ideal CVH</i> |       |            |
|                              | Intermediate CVH           | 1.59* | 1.18-2.14 |                              | Intermediate CVH           | 1.57  | 0.88-2.78  |
|                              | Poor CVH                   | 2.65* | 1.71-4.11 |                              | Poor CVH                   | 3.07* | 1.71-5.50  |
| Exam 2 n=1,545               | <i>Referent: Ideal CVH</i> |       |           | Exam 2 n=1,410               | <i>Referent: Ideal CVH</i> |       |            |
|                              | Intermediate CVH           | 1.61* | 1.09-2.40 |                              | Intermediate CVH           | 1.33  | 0.80-2.23  |
|                              | Poor CVH                   | 2.42* | 1.43-4.11 |                              | Poor CVH                   | 1.95* | 1.12-1.92  |
| Exam 3 n=1,609               | <i>Referent: Ideal CVH</i> |       |           | Exam 3 n=1,493               | <i>Referent: Ideal CVH</i> |       |            |
|                              | Intermediate CVH           | 1.48* | 1.07-2.04 |                              | Intermediate CVH           | 0.84  | 0.41-1.72  |
|                              | Poor CVH                   | 2.15* | 1.25-3.69 |                              | Poor CVH                   | 1.52  | 0.72-3.18  |
| Exam 4 n=1,548               | <i>Referent: Ideal CVH</i> |       |           | Exam 4 n=1,402               | <i>Referent: Ideal CVH</i> |       |            |
|                              | Intermediate CVH           | 2.19* | 1.65-2.89 |                              | Intermediate CVH           | 2.19  | 0.70-6.77  |
|                              | Poor CVH                   | 3.07* | 1.87-5.04 |                              | Poor CVH                   | 3.68* | 1.18-11.49 |
| Exam 5 n=1,389               | <i>Referent: Ideal CVH</i> |       |           | Exam 5 n=1,248               | <i>Referent: Ideal CVH</i> |       |            |
|                              | Intermediate CVH           | 1.95* | 1.44-2.64 |                              | Intermediate CVH           | 1.96* | 1.07-3.58  |
|                              | Poor CVH                   | 2.99* | 1.82-4.93 |                              | Poor CVH                   | 3.71* | 1.92-7.14  |
| Exam 6 n=1,173               | <i>Referent: Ideal CVH</i> |       |           | Exam 6 n=978                 | <i>Referent: Ideal CVH</i> |       |            |
|                              | Intermediate CVH           | 1.52* | 1.10-2.09 |                              | Intermediate CVH           | 1.32  | 0.76-2.28  |
|                              | Poor CVH                   | 2.14* | 1.09-4.19 |                              | Poor CVH                   | 2.43* | 1.31-4.50  |
| Pooled model (All six exams) | <i>Referent: Ideal CVH</i> |       |           | Pooled model (All six exams) | <i>Referent: Ideal CVH</i> |       |            |
|                              | Intermediate CVH           | 1.46* | 1.18-1.79 |                              | Intermediate CVH           | 1.31  | 0.84-2.07  |
|                              | Poor CVH                   | 2.77* | 2.00-3.84 |                              | Poor CVH                   | 2.12* | 1.32-3.43  |

This table shows results from a proportional-odds cumulative logit model, estimating the odds of predicting offspring CVH status using their mothers or fathers CVH status. Dependent variable is offspring CVH (three-level ordinal variable, coded 0, 1, 2: ideal, intermediate and poor CVH, respectively), independent variable is parents' CVH, coded 0, 1, 2 as well. All models were adjusted for offspring age, sex and education. \*Statistically significant at  $p < 0.05$ . CI=confidence interval

**Figure S1. Distribution and trends of ideal CVH for parents and offspring at similar age-periods along the life course.**

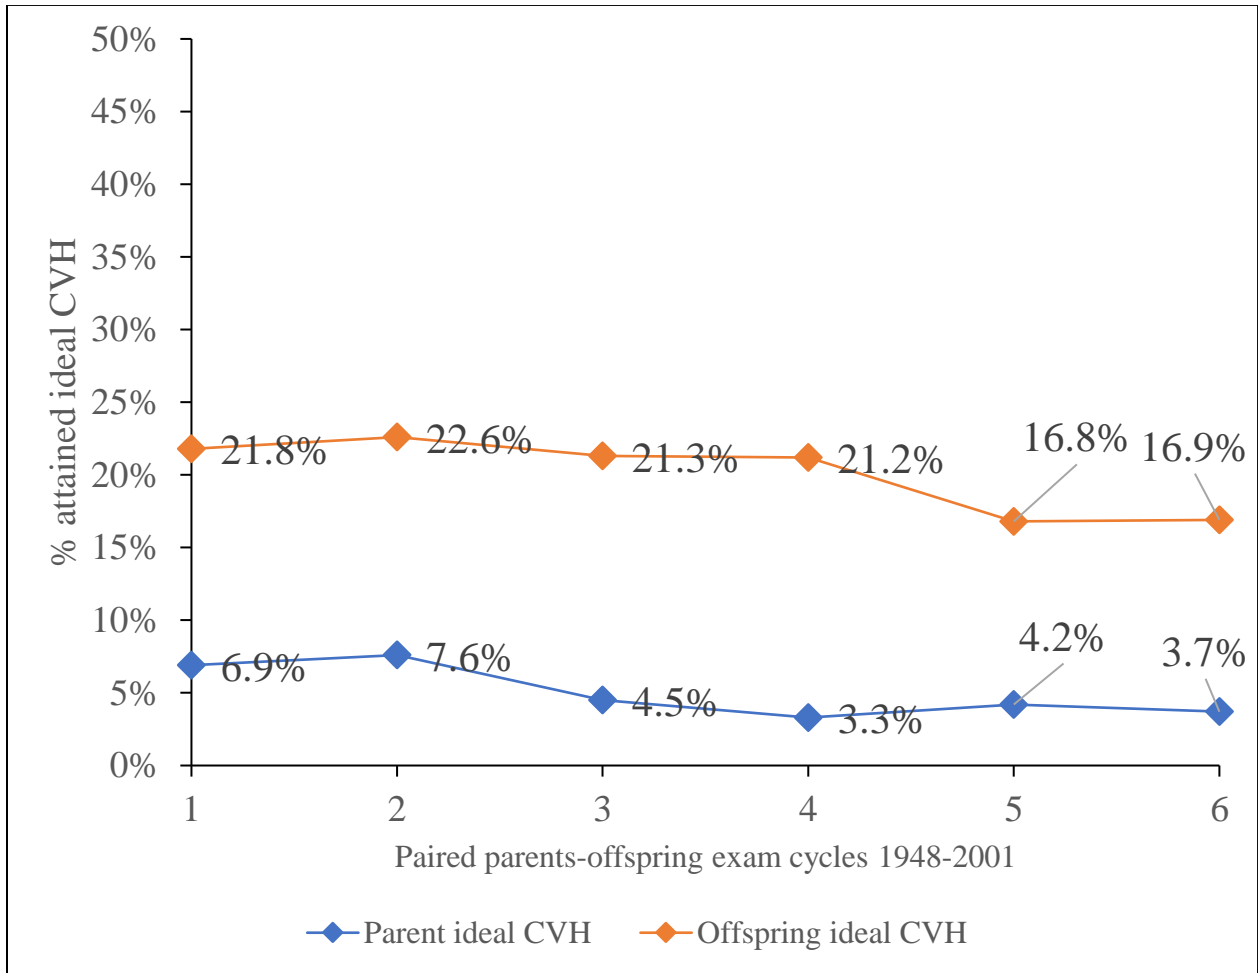

Ideal CVH in this case means having more than 4 CVH metrics at ideal/recommended levels; For exam cycles 1-6 time periods, refer to paired exam cycles “Table S1”.
